# Supplementary material for: Outcomes of community-based differentiated models of multi-month dispensing of antiretroviral medication among stable HIV-infected patients in Lesotho: a cluster randomised non-inferiority trial protocol
Source: Springer Nature journal article supplement (doi:10.1186/s12889-018-5961-0), 2018-08-29
Supplement: MOESM1 [file 16082360]

## Data collection matrix and schedule of events

| Evaluation                                                                                           | Entry | 12 months | 24 months |
|------------------------------------------------------------------------------------------------------|-------|-----------|-----------|
| <b>Enrollment</b>                                                                                    |       |           |           |
| • Screening                                                                                          | X     |           |           |
| • Informed Consent                                                                                   | X     |           |           |
| • Enrollment                                                                                         | X     |           |           |
| <b>Interventions</b>                                                                                 |       |           |           |
| • Standard of Care Dispensing (Control)                                                              | ◆     | ◆         | ◆         |
| • 3 – Month Dispensing                                                                               | ◆     | ◆         | ◆         |
| • 6 – Dispensing                                                                                     | ◆     | ◆         | ◆         |
| <b>Evaluations</b>                                                                                   |       |           |           |
| <b>Clinical data</b>                                                                                 | X     |           |           |
| • Date HIV diagnosis                                                                                 |       |           |           |
| • ART start date                                                                                     |       |           |           |
| • Medications at entry (ART, CPT, IPT)                                                               |       |           |           |
| • ART dispensing interval at time of entry                                                           |       |           |           |
| • CD4 at ART initiation/CD4 if documented within 12 months prior to entry                            |       |           |           |
| • Viral load at entry                                                                                |       |           |           |
| <b>Socio – demographic data</b>                                                                      | X     |           |           |
| • Age                                                                                                |       |           |           |
| • Marital status                                                                                     |       |           |           |
| • Gender                                                                                             |       |           |           |
| • Education                                                                                          |       |           |           |
| <b>Medical record review for endpoint<sup>^</sup></b>                                                |       | X         | X         |
| • Retention in care*                                                                                 |       |           |           |
| • Viral load                                                                                         |       |           |           |
| • ART regimen changes                                                                                |       |           |           |
| • Medication review [CPT (Septrin); IPT]                                                             |       |           |           |
| • Current dispensing interval ( <i>if changed, date of change and reason for change documented</i> ) |       |           |           |
| • Laboratory tests recorded, if any (CD4)                                                            |       |           |           |
| <b>Time and Motion Analysis</b>                                                                      | X     |           |           |
| • Patient wait times                                                                                 |       |           |           |
| Cost Assessment                                                                                      | X     |           |           |
| Clinic Resource Allocation Assessment                                                                | X     | X         | X         |
| Focus Group discussions with participants                                                            | X     | X         | X         |
| Qualitative in-depth interviews with service providers                                               | X     | X         | X         |

<sup>^</sup>Individuals who meet an endpoint will be followed for the remainder of the study in observational follow-up;

\*Default defined as out of ART ≥90 days

ART: Antiretroviral treatment; CD4: cluster of differentiation 4; CPT: Co-trimoxazole; HIV: human immunodeficiency virus; IPT: isoniazid
